# Supplementary material
Source: publisher figshare collection journal article supplement (https://frontiersin.figshare.com/ndownloader/files/23235767)

Figure S2. Total abundance of the microbiome OTUs recovered from sponges and seawater samples as a function of its prevalence and classified by phyla. Log scale in the x-axis. Discontinuous line indicates 5% prevalence.

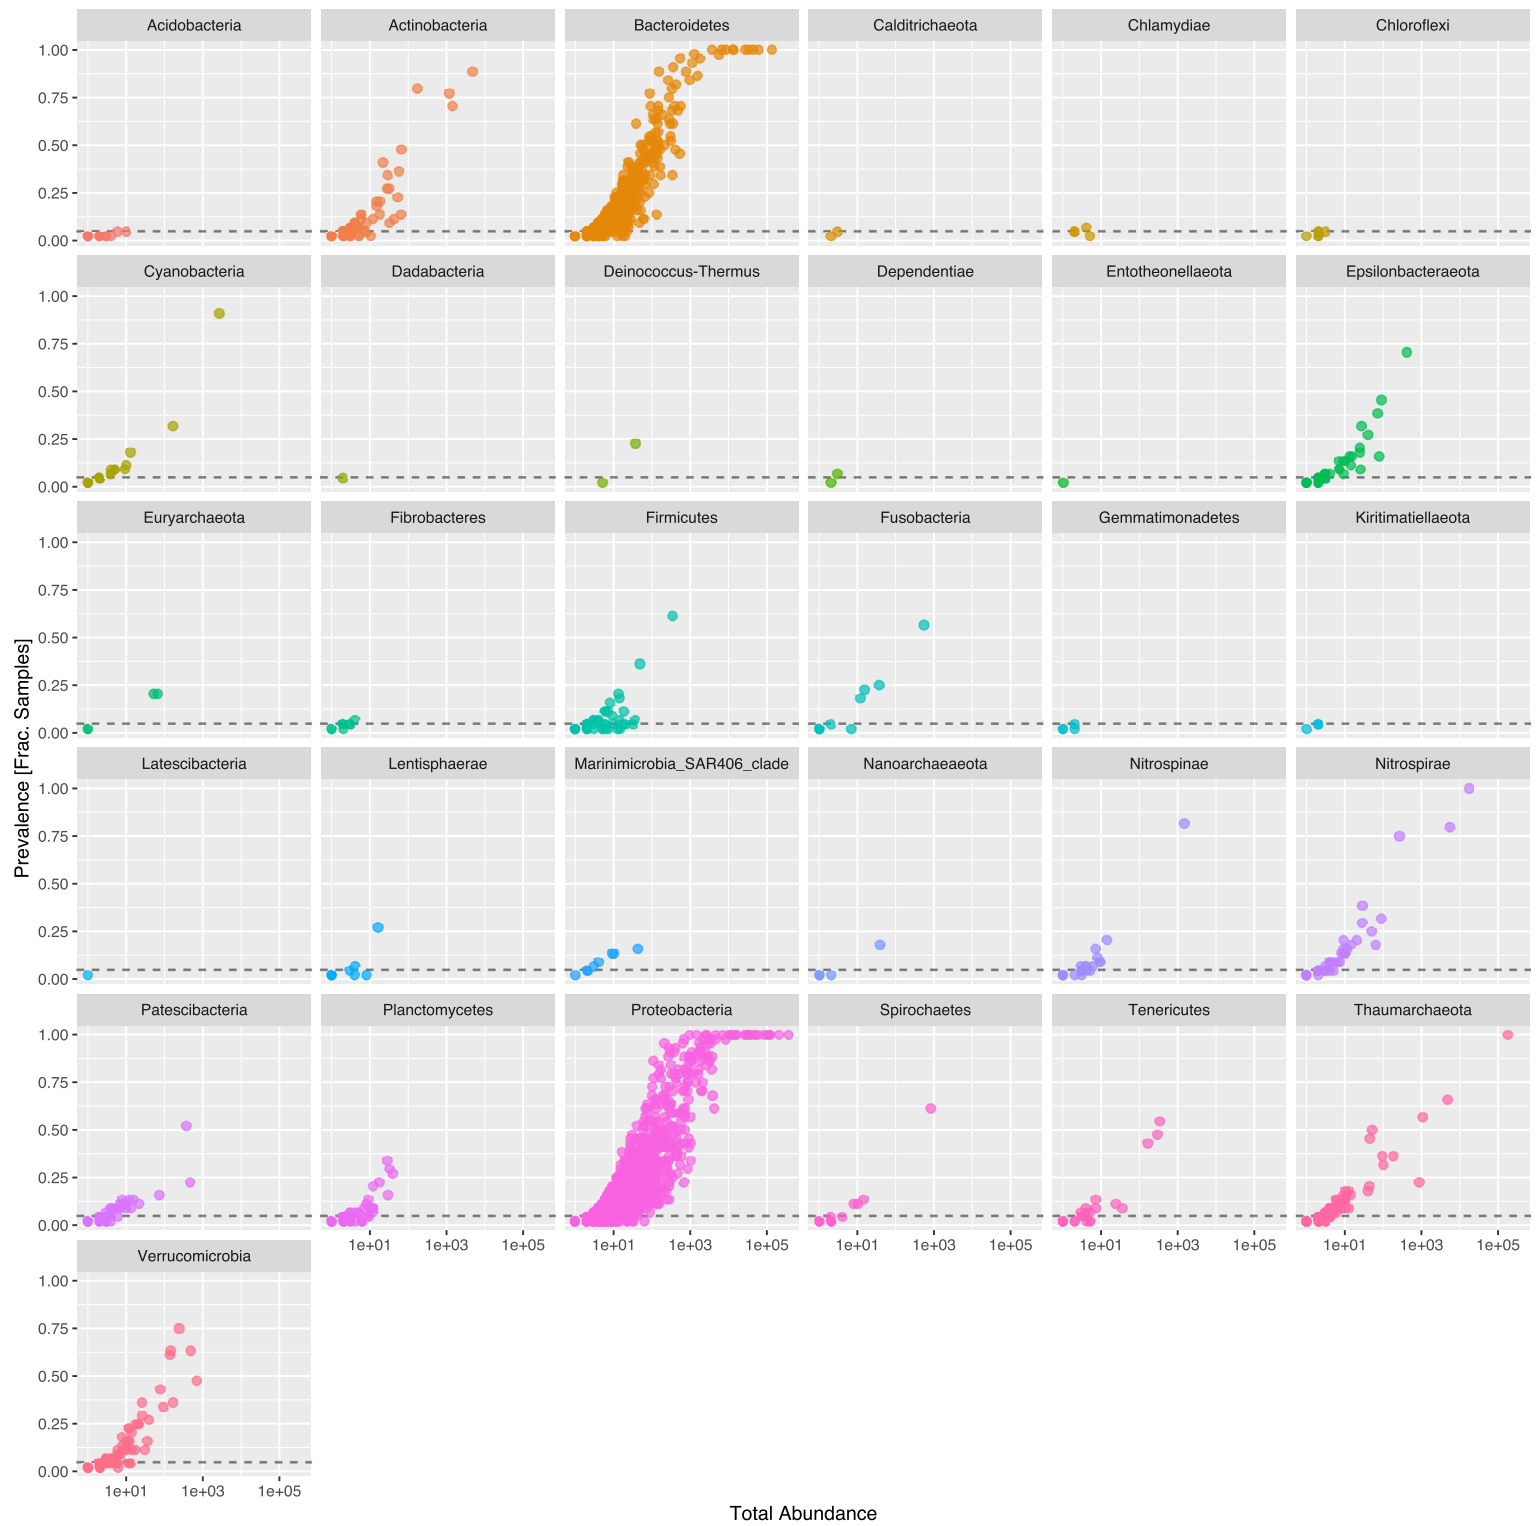

Supplement: Supplementary file 1 [file 23235767]
